# Supplementary material for: Topical Imiquimod in Primary Cutaneous Extramammary Paget’s Disease: A Systematic Review
Source: MDPI journal article supplement (doi:10.3390/cancers15235665), 2023-11-30
Supplement: s1 [file s1]

## Supplementary material

List of supplementary materials:

1. **Supplementary Table S1:** PRISMA checklist.
2. **Supplementary Table S2:** Main characteristics of the included studies and summery of demographics and EMPD features.
3. **Supplementary Table S3:** Results for JBI critical appraisal tool for quasi-experimental studies.
4. **Supplementary Table S4:** Results for JBI critical appraisal tool for case series studies.
5. **Supplementary Table S5:** Results for JBI critical appraisal tool for case report studies.

**Table S1:** PRISMA checklist.

| Section/topic       | # | Checklist item                                                                                                                                                                                                                                                                                              | Reported on page # |
|---------------------|---|-------------------------------------------------------------------------------------------------------------------------------------------------------------------------------------------------------------------------------------------------------------------------------------------------------------|--------------------|
| <b>TITLE</b>        |   |                                                                                                                                                                                                                                                                                                             |                    |
| Title               | 1 | <b>Topical Imiquimod in primary cutaneous extramammary Paget's disease: a systematic review.</b>                                                                                                                                                                                                            | 1                  |
| <b>ABSTRACT</b>     |   |                                                                                                                                                                                                                                                                                                             |                    |
| Structured summary  | 2 | Provide a structured summary including, as applicable: background; objectives; data sources; study eligibility criteria, participants, and interventions; study appraisal and synthesis methods; results; limitations; conclusions and implications of key findings; systematic review registration number. | 1                  |
| <b>INTRODUCTION</b> |   |                                                                                                                                                                                                                                                                                                             |                    |

|                                    |    |                                                                                                                                                                                                                        |     |
|------------------------------------|----|------------------------------------------------------------------------------------------------------------------------------------------------------------------------------------------------------------------------|-----|
| Rationale                          | 3  | Describe the rationale for the review in the context of what is already known.                                                                                                                                         | 2   |
| Objectives                         | 4  | Provide an explicit statement of questions being addressed with reference to participants, interventions, comparisons, outcomes, and study design (PICOS).                                                             | 2   |
| <b>METHODS</b>                     |    |                                                                                                                                                                                                                        |     |
| Protocol and registration          | 5  | Indicate if a review protocol exists, if and where it can be accessed (e.g., Web address), and, if available, provide registration information including registration number.                                          | 2   |
| Eligibility criteria               | 6  | Specify study characteristics (e.g., PICOS, length of follow-up) and report characteristics (e.g., years considered, language, publication status) used as criteria for eligibility, giving rationale.                 | 2-3 |
| Information sources                | 7  | Describe all information sources (e.g., databases with dates of coverage, contact with study authors to identify additional studies) in the search and date last searched.                                             | 3   |
| Search                             | 8  | Present full electronic search strategy for at least one database, including any limits used, such that it could be repeated.                                                                                          | 3   |
| Study selection                    | 9  | State the process for selecting studies (i.e., screening, eligibility, included in systematic review, and, if applicable, included in the meta-analysis).                                                              | 4   |
| Data collection process            | 10 | Describe method of data extraction from reports (e.g., piloted forms, independently, in duplicate) and any processes for obtaining and confirming data from investigators.                                             | 3   |
| Data items                         | 11 | List and define all variables for which data were sought (e.g., PICOS, funding sources) and any assumptions and simplifications made.                                                                                  | 3   |
| Risk of bias in individual studies | 12 | Describe methods used for assessing risk of bias of individual studies (including specification of whether this was done at the study or outcome level), and how this information is to be used in any data synthesis. | 3   |
| Summary measures                   | 13 | State the principal summary measures (e.g., risk ratio, difference in means).                                                                                                                                          | 3   |
| Synthesis of results               | 14 | Describe the methods of handling data and combining results of studies, if done, including measures of consistency (e.g., $I^2$ ) for each meta-analysis.                                                              | 3   |

**Table S2.** Main characteristics of the included studies and summery of demographics and EMPD features.

| N°        | Author             | Year of publica<br>tion | Study<br>design | LE | Conflict<br>of<br>interest | N° of Partic<br>ipant | N° of<br>cases | Age (years)       |                    | Sex<br>(F/MI)                    | Race                             | N° of<br>lesions | Lesion location                                    | Tumor size         |                   | Tumor<br>stage | Duration of<br>EMPD (months) |                   |
|-----------|--------------------|-------------------------|-----------------|----|----------------------------|-----------------------|----------------|-------------------|--------------------|----------------------------------|----------------------------------|------------------|----------------------------------------------------|--------------------|-------------------|----------------|------------------------------|-------------------|
|           |                    |                         |                 |    |                            |                       |                | Md<br>(M)         | Range<br>(SD)      |                                  |                                  |                  |                                                    | Md<br>(M)          | Range<br>(SD)     |                | Md<br>(M)                    | Range<br>(SD)     |
| 1<br>[19] | Zampogna,<br>J.C.  | 2002                    | Case report     | 4  | Declared                   | 2                     | 2              | 57                |                    | MI                               | Caucasian<br>(2p)                | 1                | Scrotum                                            | 3x5                |                   | 0 (2p)         | 48                           |                   |
|           |                    |                         |                 |    |                            |                       |                | 72                |                    | MI                               |                                  | 2                | Perineal and<br>inguinal                           | NR                 |                   |                | 120                          |                   |
| 2<br>[20] | Mirer, E           | 2006                    | Case report     | 4  | Not<br>available           | 2                     | 2              | 80                |                    | F                                | Caucasian<br>(2p)                | 1                | Intergluteal fold,<br>perianal and vulva           | 6x9                |                   | 0 (2p)         | 5                            |                   |
|           |                    |                         |                 |    |                            |                       |                | 90                |                    | F                                |                                  | 1                | Nipple and areola                                  | 10                 |                   |                | 180                          |                   |
| 3<br>[36] | Hatch,<br>K.D.     | 2008                    | Case report     | 4  | Not<br>available           | 2                     | 2              | 68                |                    | F                                | NR                               | 1                | Vulva and<br>perianal                              | NR                 |                   | 0 (2p)         | 72                           |                   |
|           |                    |                         |                 |    |                            |                       |                | 60                |                    | F                                |                                  | 1                | Vulva, groin,<br>buttocks, and<br>upper thigh      |                    |                   |                | 156                          |                   |
| 4<br>[38] | Challenor,<br>R.   | 2009                    | Case report     | 4  | None<br>declared           | 2                     | 2              | 48                |                    | F                                | Caucasian<br>(2p)                | 1                | Vulva                                              | NR                 |                   | 0 (2p)         | 12                           |                   |
|           |                    |                         |                 |    |                            |                       |                | 66                |                    | F                                |                                  | 1                | Vulva                                              |                    |                   |                | 24                           |                   |
| 5<br>[32] | Tanaka,<br>V.D.A.  | 2009                    | Case series     | 4  | Not<br>available           | 14                    | 1              | 68                |                    | M                                | Caucasian                        | 1                | Axilla                                             | 8                  |                   | 0              | 5.4 <sup>1</sup>             | 1-15 <sup>1</sup> |
| 6 [5]     | Pang, J.           | 2010                    | Case series     | 4  | None<br>declared           | 14                    | 12             | (73) <sup>1</sup> | 58-91 <sup>1</sup> | F (12p),<br>MI (2p) <sup>1</sup> | NR                               | 15 <sup>1</sup>  | Axilla (1p) and<br>genital area (13p) <sup>1</sup> | (6.7) <sup>1</sup> | 2-15 <sup>1</sup> | 0 (12p)        | 34.7 <sup>1</sup>            | 0-74 <sup>1</sup> |
| 7<br>[34] | Sendagorta<br>, E. | 2010                    | Case report     | 4  | None<br>declared           | 3                     | 3              | 66                | 58-82              | F (3p)                           | Caucasian<br>(3p)                | 1                | Vulva (3p)                                         | NR                 |                   | 0 (3p)         | 6                            | 2-12              |
| 8<br>[42] | Shelbi,<br>C.J.O.  | 2011                    | Case report     | 4  | None<br>declared           | 2                     | 2              | 75                |                    | MI (2p)                          | Asian (2p)                       | 1                | Scrotum                                            | NR                 |                   | 0 (2p)         | 12                           |                   |
|           |                    |                         |                 |    |                            |                       |                | 70                |                    |                                  |                                  | 1                | scrotum, groin<br>and perineum                     |                    |                   |                | 48                           |                   |
| 9<br>[31] | Baiocchi,<br>C.    | 2012                    | Case series     | 4  | None<br>declared           | 4                     | 4              | (62.2)            | 56-80              | F (4p)                           | Caucasian<br>(3p),<br>Asian (1p) | 4                | Vulva (4p) and<br>perianal (3p),<br>perineal (3p)  | NR                 |                   | 0 (4p)         | NR                           |                   |
| 10        | Boulard, C.        | 2013                    | Case report     | 4  |                            | 2                     | 2              | 40                |                    | F (2p)                           |                                  | 1                | Vulva (2p)                                         | NR                 |                   | 0 (2p)         | NR                           |                   |

|         |                     |      |                     |   |               |     |    |                     |                    |                                  |                            |    |                                                               |     |         |        |       |
|---------|---------------------|------|---------------------|---|---------------|-----|----|---------------------|--------------------|----------------------------------|----------------------------|----|---------------------------------------------------------------|-----|---------|--------|-------|
| [39]    |                     |      |                     |   | None declared |     |    | 61                  |                    |                                  | Caucasian (2p)             | 1  |                                                               |     |         |        |       |
| 11 [1]  | Choi, J.H.          | 2013 | Case series         | 4 | Not available | 10  | 10 | 65.5                | 60-81              | F (3p), MI (7p)                  | Asian (10p)                | 10 | penescrotal (5p), vulva (3p), inguinal (2p)                   | NR  | 0 (10p) | (73.6) | 4-360 |
| 12 [14] | Sanderson, P.       | 2013 | Case series         | 4 | None declared | 6   | 6  | 70                  | 58-85              | F (6p)                           | NR                         | 6  | Vulva (6p), perineal (2p), anus (1p), groin (1p), thigh (1p)  | NR  | 0 (6p)  | 15     | 6-24  |
| 13 [40] | Jing, W.            | 2014 | Case report         | 4 | Not available | 2   | 2  | 72                  |                    | MI (2p)                          | Asian (2p)                 | 2  | Scrotum, groins, perineum and penis                           | NR  | 0 (2p)  | 48     |       |
|         |                     |      |                     |   |               |     |    | 56                  |                    |                                  |                            | 2  | Scrotum, groin and penis                                      |     |         | 24     |       |
| 14 [33] | Luyten, A.          | 2014 | Case series         | 4 | None declared | 21  | 21 | (66.4)              | 41-84              | F (21p)                          | NR                         | 21 | Vulva (21p)                                                   | NR  | 0 (21p) | NR     |       |
| 15 [34] | Marchitelli, C.     | 2014 | Case series         | 4 | None declared | 10  | 10 |                     | 60-92              | F (10p)                          | NR                         | NR | Vulva (10p)                                                   | NR  | 0 (10p) | NR     |       |
| 16 [27] | Cowan, R.A.         | 2016 | Observational trial | 3 | None declared | 8   | 8  | 71.5                | 47-78              | F (8p)                           | Caucasian (7p), Asian (1p) | NR | vulva (8p) and perianal (1p)                                  | NR  | 0 (8p)  | NR     |       |
| 17 [3]  | Liau, M.M.          | 2016 | Case series         | 4 | None declared | 6   | 7  | 74.5                | 66-83              | F (4p), MI (2p)                  | Asian (7p)                 | 7  | Vulva (3p), both axilla (1p), Scrotum (1p), Penile shaft (1p) | NR  | 0 (6p)  |        | 12-60 |
| 18 [29] | Sawada, M.          | 2018 | Observational trial | 3 | None declared | 9   | 9  | 82                  | 61-94              | F (5p), MI (4p)                  | Asian (9p)                 | NR | vulva (5p), penile shaft (4p) and scrotum (1p)                | NR  | 0 (9p)  | NR     |       |
| 19 [41] | Apalla, Z.          | 2018 | Case report         | 4 | None declared | 2   | 2  | 48                  |                    | F                                | NR                         | 1  | <b>genital and perianal</b>                                   | NR  | 0 (2p)  | NR     |       |
|         |                     |      |                     |   |               |     |    | 62                  |                    | MI                               |                            | 1  | Pubic                                                         | 2.5 |         |        |       |
| 20 [30] | Van der Linden , M. | 2019 | Cohort              | 3 | None declared | 113 | 18 | 73 <sup>1</sup>     | 41-97 <sup>1</sup> | 18 F                             | NR                         | NR | Vulva (18p)                                                   | NR  | 0 (18p) | NR     |       |
| 21 [15] | Choi, S.            | 2021 | Case series         | 4 | None declared | 166 | 25 | (65.4) <sup>1</sup> | 37–84 <sup>1</sup> | F (44p), MI (122 p) <sup>1</sup> | Asian (25p)                | NR | scrotum, vulva, penile, perianal, other (n° NR)               | NR  | 0 (25p) | NR     |       |

|                                                |                     |      |                                                                               |                             |                                                         |     |     |             |              |                      |                                                 |    |                                                                   |                    |                       |                    |             |       |
|------------------------------------------------|---------------------|------|-------------------------------------------------------------------------------|-----------------------------|---------------------------------------------------------|-----|-----|-------------|--------------|----------------------|-------------------------------------------------|----|-------------------------------------------------------------------|--------------------|-----------------------|--------------------|-------------|-------|
| 22<br>[35]                                     | Christodoulidou, M. | 2021 | Case series                                                                   | 4                           | None declared                                           | 10  | 5   | 71          | 66-82        | MI (5p)              | NR                                              | NR | inguinal (2) and penoscrotal (5)                                  | NR                 |                       | 0 (5p)             | NR          |       |
| 23<br>[28]                                     | Van der Linden, M.  | 2022 | Clinical Trial                                                                | 2                           | None declared                                           | 24  | 23  | 67          | 42-84        | F (24p)              | Caucasian (22p), Hispanic (1p), Asian (1p)      | NR | Vulva (24p)                                                       | 16 cm <sup>2</sup> | 3-130 cm <sup>2</sup> | 0 (24p)            | 24          | 0-216 |
| 24<br>[6]                                      | Borella, F.         | 2022 | Cohort                                                                        | 3                           | None declared                                           | 55  | 55  | (63)        | 36-92 (± 12) | F (55p)              | Caucasian (55p)                                 | NR | Vulva (55p)                                                       | (6)                | 0.5-29 (± 5.5)        | 0 (42p), I (9p)    | NR          |       |
| Global characteristics of the included studies |                     |      | Observational trials (3)<br>Cohort (2)<br>Case series (10)<br>Case series (9) | 2 (1)<br>3 (4)<br>4<br>(19) | Not available (5)<br>None declared (18)<br>Declared (1) | 489 | 233 | Range 36-97 |              | F (182p)<br>MI (28p) | Caucasian (99p)<br>Asian (58p)<br>Hispanic (1p) |    | Vulva (167p)<br>Penescrotal (22p)<br>Perianal (8p)<br>Axilla (3p) | Range 0.5-130      |                       | 0 (220p)<br>I (9p) | Range 5-360 |       |

1: This value refers to the total number of participants. The data relating specifically to the cases treated with imiquimod is not available.

Nº (number), LE (level of evidence), Nº of cases (patient with cutaneous Paget's Disease treated with topical Imiquimod), Md (median), M (mean), SD (standard deviation), F (female), MI (male), p (patients), NR (no reported).

**Table S3:** Results for JBI critical appraisal tool for quasi-experimental studies.

| i.d. | Author; year of publication | Item 1 | Item 2 | Item 3 | Item 4 | Item 5 | Item 6 | Item 7 | Item 8 | Item 9 |
|------|-----------------------------|--------|--------|--------|--------|--------|--------|--------|--------|--------|
| 16   | Cowan, R.A.; 2016           | +      | +      | ×      | ×      | ×      | +      | +      | +      | -      |
| 18   | Sawada, M.; 2017            | +      | +      | ×      | ×      | ×      | +      | +      | +      | -      |
| 20   | Van der Linden, M.; 2018    | +      | +      | ×      | ×      | ×      | +      | +      | -      | +      |
| 23   | Van der Linden; 2022        | +      | +      | ×      | ×      | ×      | +      | +      | +      | +      |
| 24   | Borella, F.; 2022           | +      | +      | ×      | ×      | ×      | +      | +      | +      | +      |

Answers to the JBI critical appraisal checklist: Yes (“+”in green circle), No (“x” in red circle), Unclear/ incomplete information (“-” in yellow circle) or Not/Applicable (NA).

**Table S4:** Results for JBI critical appraisal tool for case series studies.

| i.d. | Author, year of publication | Item 1 | Item 2 | Item 3 | Item 4 | Item 5 | Item 6 | Item 7 | Item 8 | Item 9 | Item 10 |
|------|-----------------------------|--------|--------|--------|--------|--------|--------|--------|--------|--------|---------|
| 5    | Tanaka, V.D.A.; 2009        | ✗      | -      | +      | +      | +      | +      | +      | +      | NA     | ✗       |
| 6    | Pang, J.; 2010              | ✗      | +      | +      | +      | +      | -      | -      | +      | NA     | ✗       |
| 9    | Baiocchi, C.; 2012          | +      | +      | +      | +      | +      | +      | +      | -      | NA     | ✗       |
| 11   | Choi, J.H.; 2013            | ✗      | +      | +      | +      | -      | +      | +      | +      | NA     | ✗       |
| 12   | Sanderson, P.; 2013         | +      | +      | +      | ✗      | +      | -      | +      | +      | NA     | ✗       |
| 14   | Luyten, A.; 2014            | +      | +      | +      | +      | +      | -      | +      | ✗      | NA     | +       |
| 15   | Marchitelli, C.; 2014       | +      | +      | +      | ✗      | ✗      | -      | +      | +      | NA     | ✗       |
| 17   | Liau, M.M.; 2016            | +      | +      | +      | +      | +      | +      | +      | -      | NA     | ✗       |
| 21   | Choi, S.; 2020              | +      | +      | +      | +      | +      | -      | -      | -      | NA     | +       |
| 22   | Christodoulidou, M.; 2021   | +      | +      | +      | +      | +      | -      | -      | -      | NA     | ✗       |

Answers to the JBI critical appraisal checklist: Yes (“+”in green circle), No (“x” in red circle), Unclear/ incomplete information (“-” in yellow circle) or Not/Applicable (NA).

**Table S5:** Results for JBI critical appraisal tool for case report studies.

| i.d. | Author; year of publication | Item 1 | Item 2 | Item 3 | Item 4 | Item 5 | Item 6 | Item 7 | Item 8 |
|------|-----------------------------|--------|--------|--------|--------|--------|--------|--------|--------|
| 1    | Zampogna, J.C.              | +      | +      | +      | +      | +      | +      | +      | +      |
| 2    | Mirer, E                    | +      | +      | +      | +      | +      | +      | +      | +      |
| 3    | Hatch, K.D.                 | +      | +      | +      | +      | +      | ×      | +      | +      |
| 4    | Challenor, R.               | +      | +      | +      | +      | +      | +      | ×      | +      |
| 7    | Sendagorta, E.              | +      | +      | +      | +      | +      | +      | +      | +      |
| 8    | Shelbi, C.J.O.              | +      | +      | +      | +      | +      | ×      | +      | +      |
| 10   | Boulard, C.                 | +      | +      | +      | +      | +      | +      | +      | +      |
| 13   | Jing, W.                    | +      | +      | +      | +      | +      | ×      | +      | +      |
| 19   | Apalla, Z.                  | +      | +      | +      | +      | +      | +      | +      | +      |

Answers to the JBI critical appraisal checklist: Yes (“+”in green circle), No (“x” in red circle), Unclear/ incomplete information (“-“ in yellow circle) or Not/Applicable (NA).
